# Supplementary material for: A DNA nanowire based localized catalytic hairpin assembly reaction for microRNA imaging in live cells
Source: Royal Society of Chemistry journal article supplement (doi:10.1039/c8sc02943a), 2018-01-01
Supplement: c8sc02943a1.pdf [file c8sc02943a1.pdf]

## **Electronic Supplementary Information (ESI)**

### **Nanowire Based Localized Catalytic Hairpin Assembly Reaction for MicroRNA Imaging in Live Cells**

Qiaomei Wei, Jin Huang\*, Jing Li, Jiaoli Wang, Xiaohai Yang, Jianbo Liu, Kemin Wang

State Key Laboratory of Chemo/Biosensing and Chemometrics, College of Chemistry and  
Chemical Engineering, Key Laboratory for Bio-Nanotechnology and Molecular Engineering of  
Hunan Province, Hunan University, Changsha 410082, P. R. China.

Tel/Fax: +86-731-88821566, \*Email: [jinhuang@hnu.edu.cn](mailto:jinhuang@hnu.edu.cn)

## Supporting tables

**Table S1.** Oligonucleotide sequences

| Oligo         | sequences (5'-3')                                                                                  |
|---------------|----------------------------------------------------------------------------------------------------|
| miR-21        | UAGCUUAUCAGACUGAUGUUGA                                                                             |
| L1            | ACAGGATTAATCTTATTAGTCGTCTCGTTACTTAAATGGTC<br>AGAAATATGGGATTAACCATGGTGTTTATGATATGAAGTGT<br>TGGAAGCT |
| L2            | CTCGAGATTATTCTAATTAGGACATTAATCCCATATTTCTGA<br>CCATTTAACGAACGAAGCTTCCAACACTTCATATCATAAAC<br>ACCATGG |
| H1            | GACGACTAATAAGATTAATCCTGTTCAACATCAGTCTGA<br>T(FAM)AAGCTA CATTGGATGCTCTAGCTTA<br>T(BHQ)CAGACTG       |
| H2            | TGTCCTAATTAGAATAATCTCGAGTAAGCTAGAGCATCCAA<br>TG TAGCTTA TCAGACTGCATTGGATGCTC                       |
| Anti-miR-21   | U*C*A*ACAUCAGUCUGAUAAGC*U*A*                                                                       |
| miR-21 mimics | U*A*G*CUUAUCAGACUGAUGUU*G*A*                                                                       |
| miR-200b      | UAAUACUGCCUGGUAAUGAUGA                                                                             |
| miR-429       | UAAUACUGUCUGGUAAAACCGU                                                                             |
| let-7d        | AGAGGUAGUAGGUUGCAUAGUU                                                                             |

The \* represents phosphorothioate modification.

## Supporting Figures

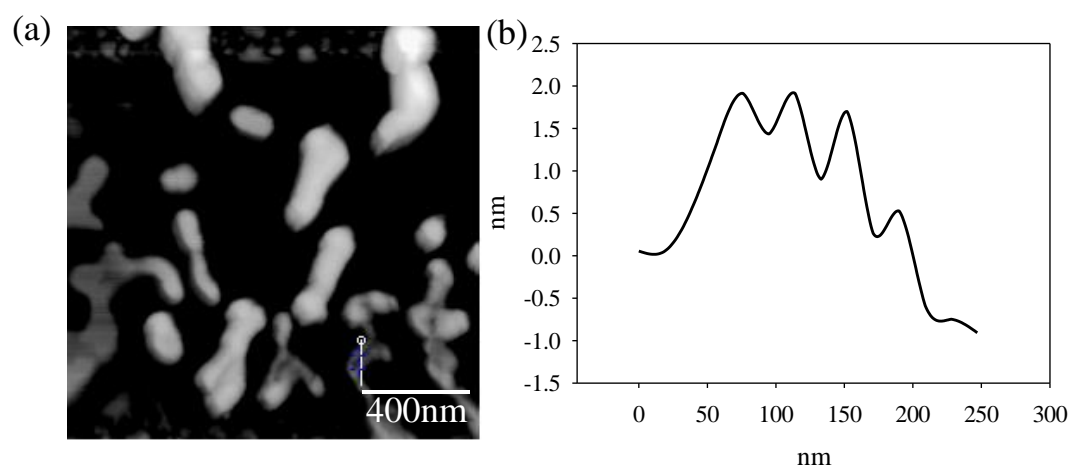

**Figure S1.** (a) AFM phase image of DNA nanowire. (b) Crosssection profile of the white line in (a).

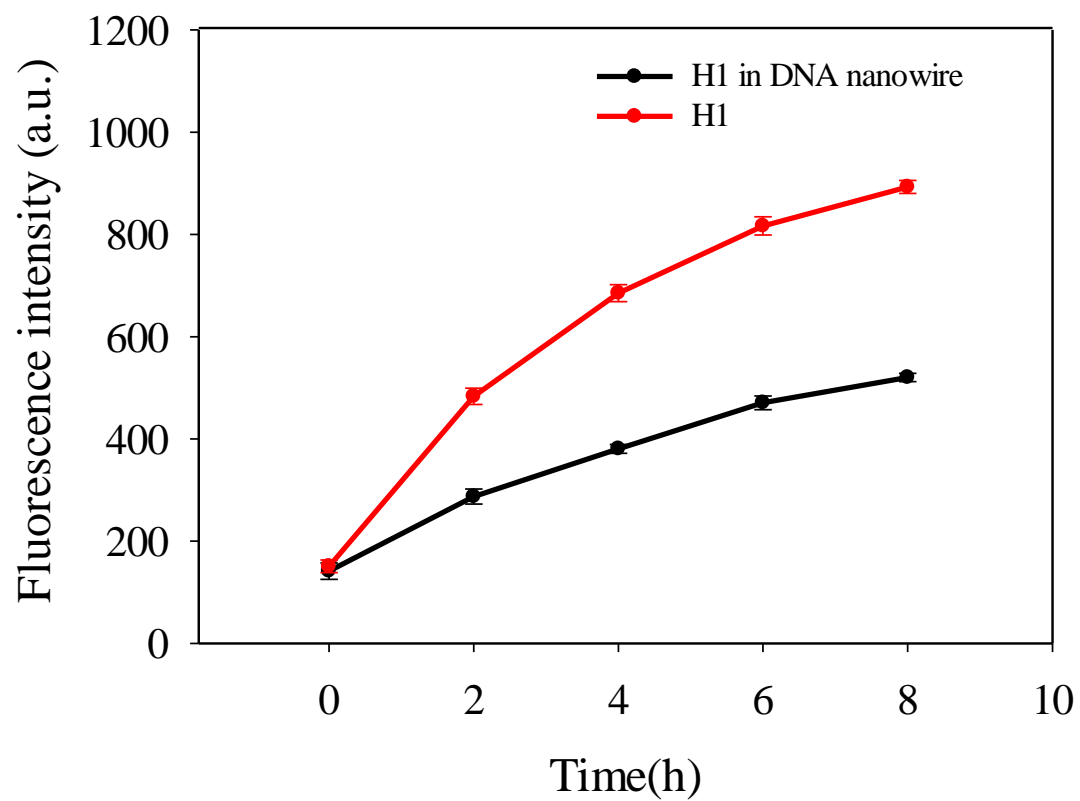

**Figure S2.** Stability of free H1 and H1 in DNA nanowire in HeLa cell lysate. The data error bars indicate means  $\pm$  SD (n=3). The concentrations of probes were both 100 nM.

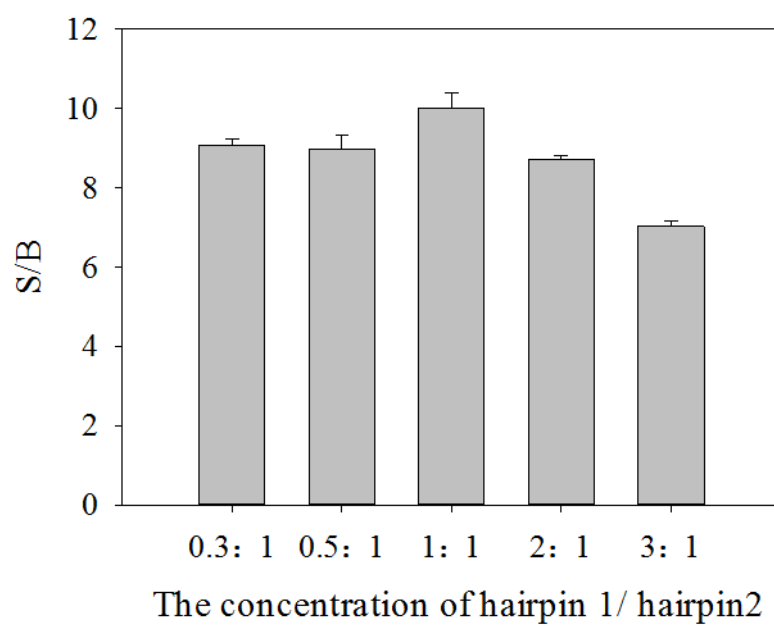

**Figure S3.** The signal-to-background (S/B) of LCHA in different ratio of H1 and H2. The concentration of H1 was fixed, and H1=100 nM, the reaction time was 1h.

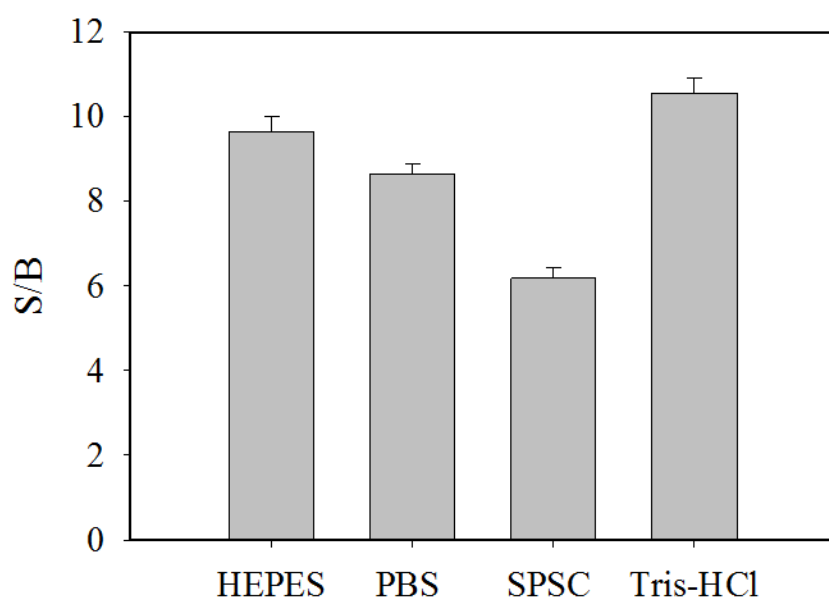

**Figure S4.** The signal-to-background (S/B) of LCHA in different kinds of buffer. The concentrations of probe and target were 100 nM and 20 nM, respectively. The reaction time was 1h

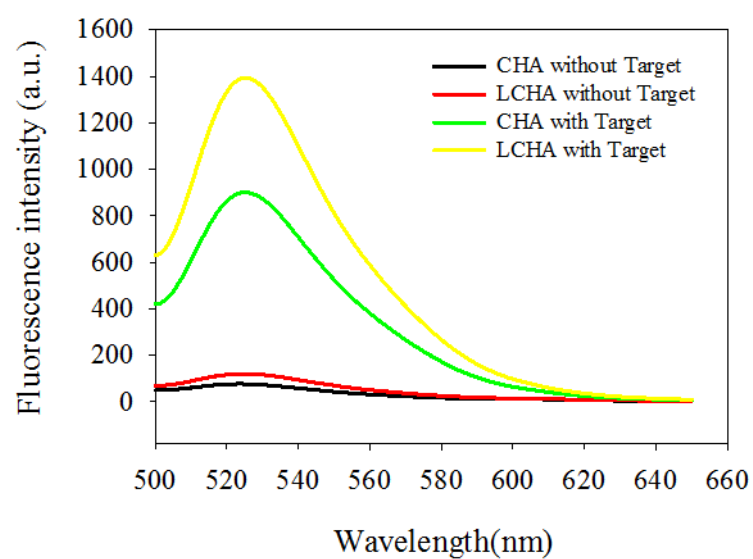

**Figure S5.** Fluorescence emission spectra of CHA and LCHA responds to DNA targets *in vitro* at 37 °C with 488 nm excitation wavelength. The concentrations of probe and target were 100 nM and 20 nM, respectively. The reaction time was 1h

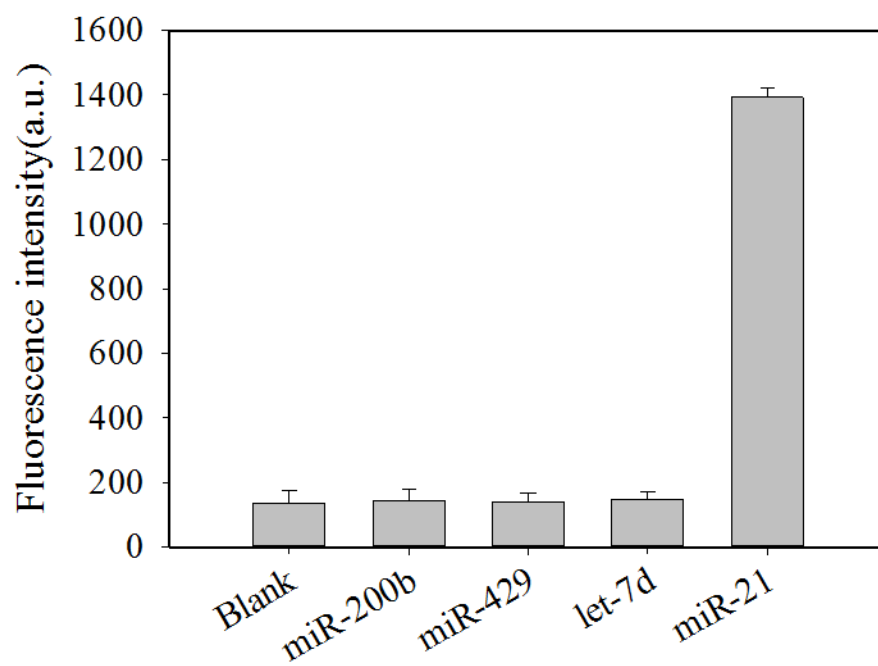

**Figure S6.** Specificity of the LCHA method for several miRNA targets. Error bars were estimated from three replicate measurements.

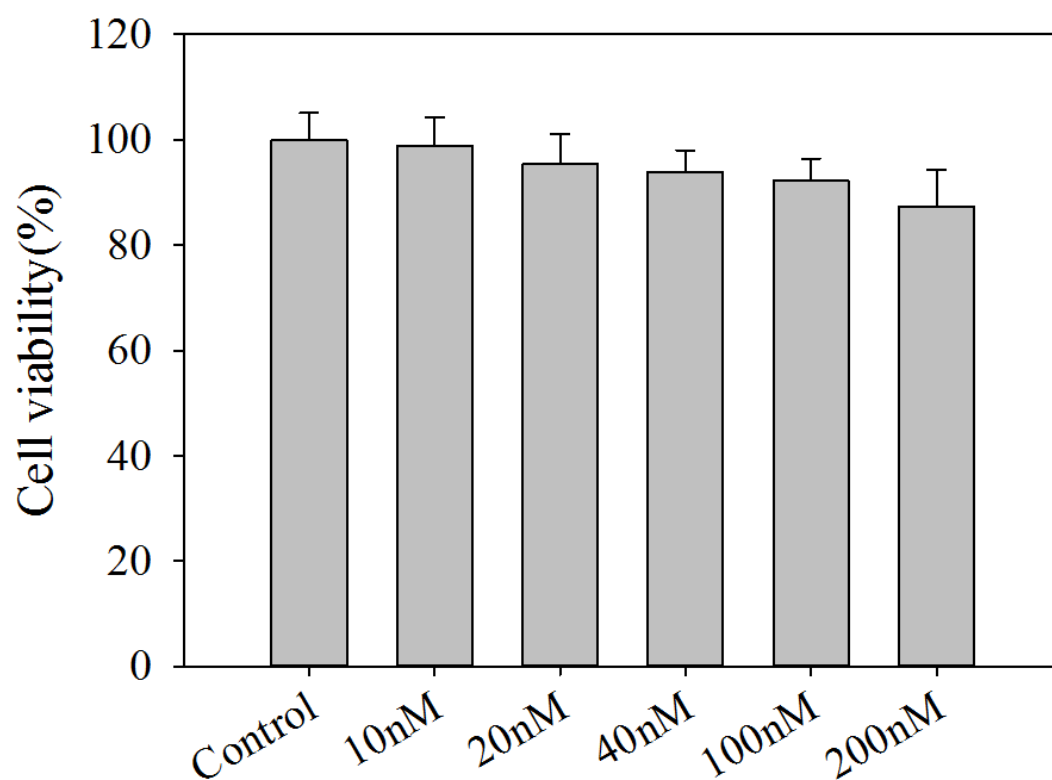

**Figure S7.** Cytotoxicity of the LCHA system incubated with HeLa cells at different concentrations of probes.

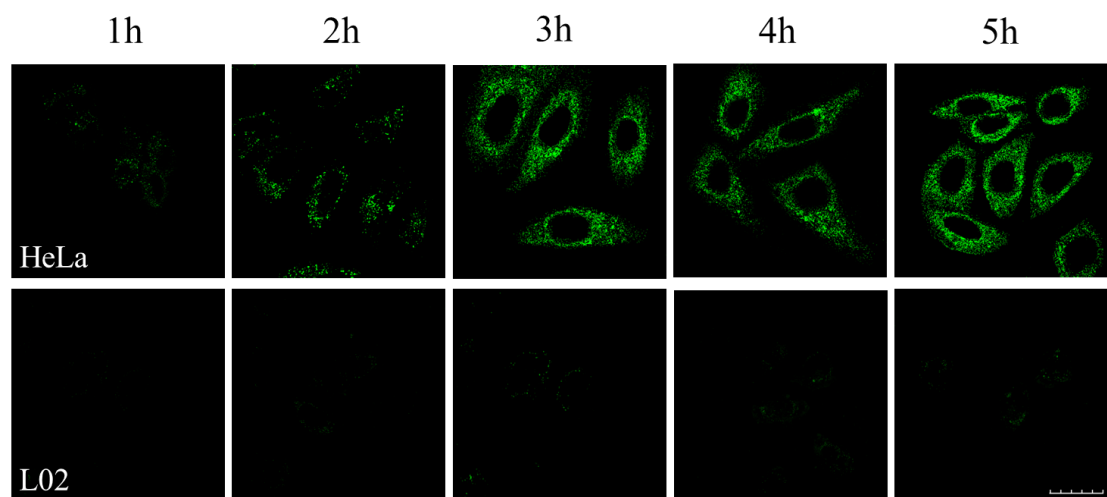

**Figure S8.** Real-time fluorescence imaging of intracellular miR-21 in HeLa cells and L02 cells. Scale bar is 20  $\mu\text{m}$ .

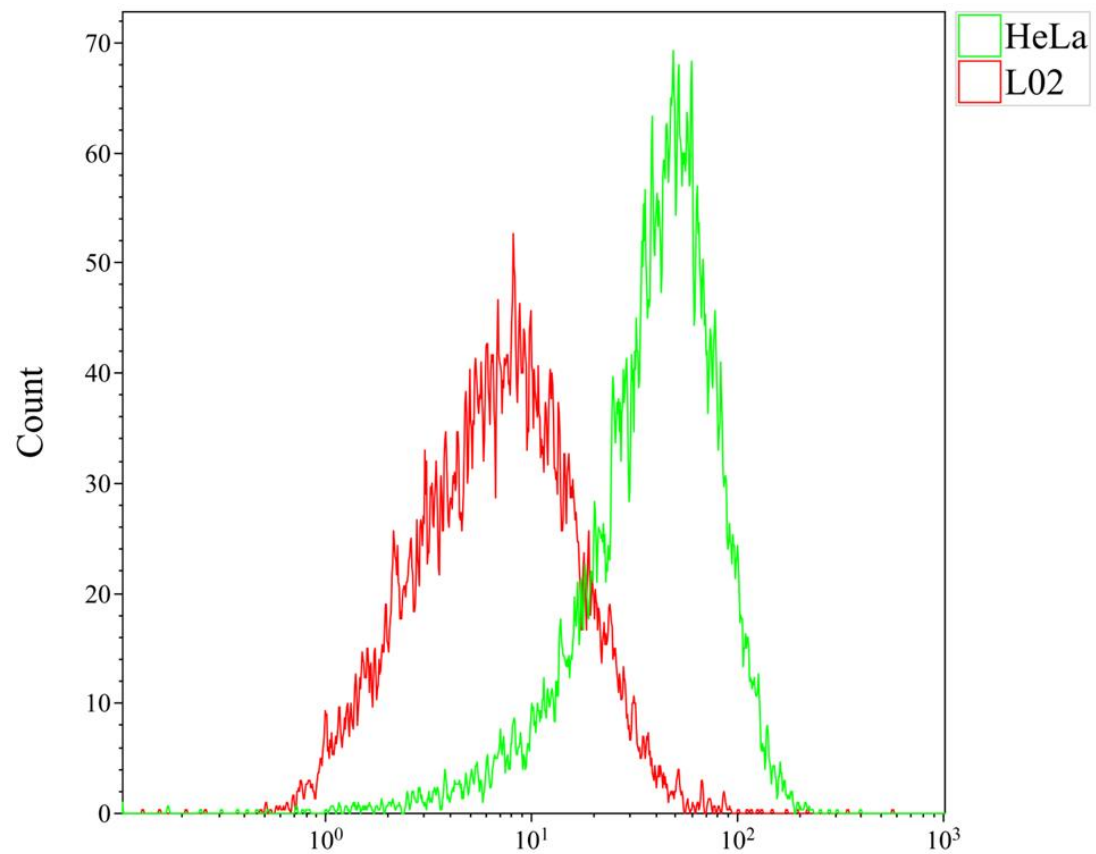

**Figure S9.** Flow cytometry analysis of the LCHA incubated with Hela cells and L02 cells, respectively.

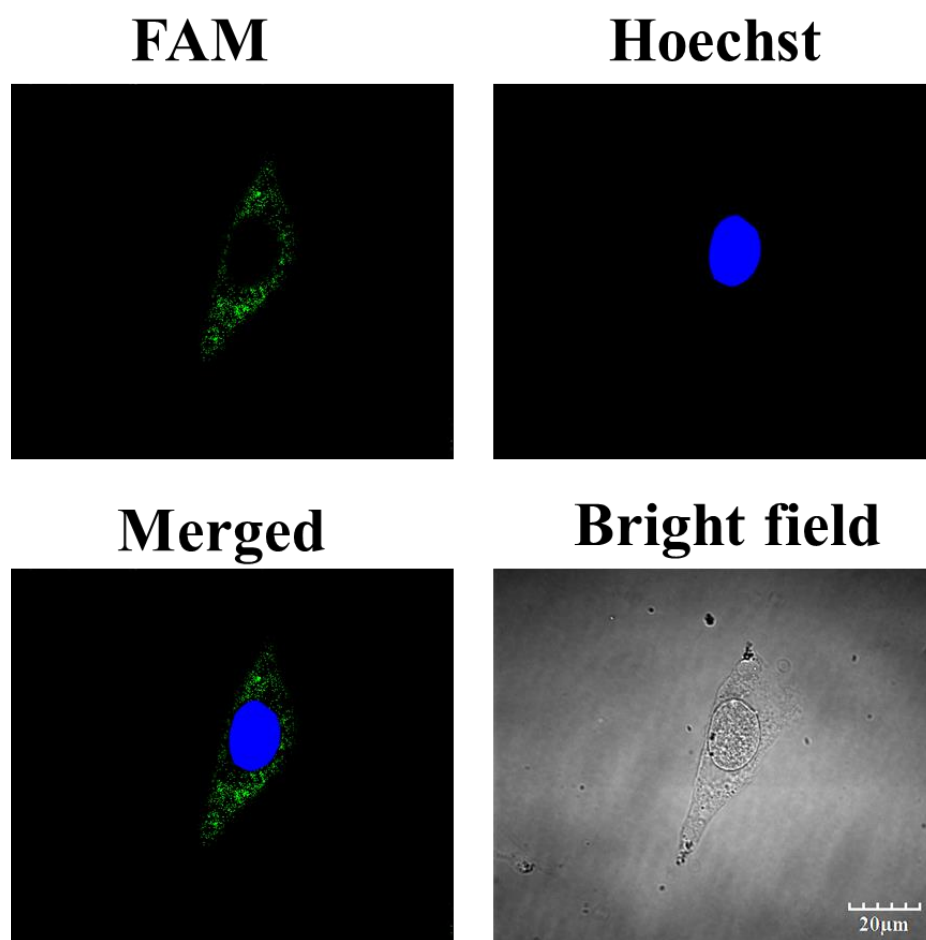

**Figure S10.** Fluorescence imaging of miR-21 in HeLa cells by LCHA. The green fluorescence represents FAM, and the blue fluorescence represents Hoechst stained cell nuclei. Scale bar is 20  $\mu\text{m}$ .

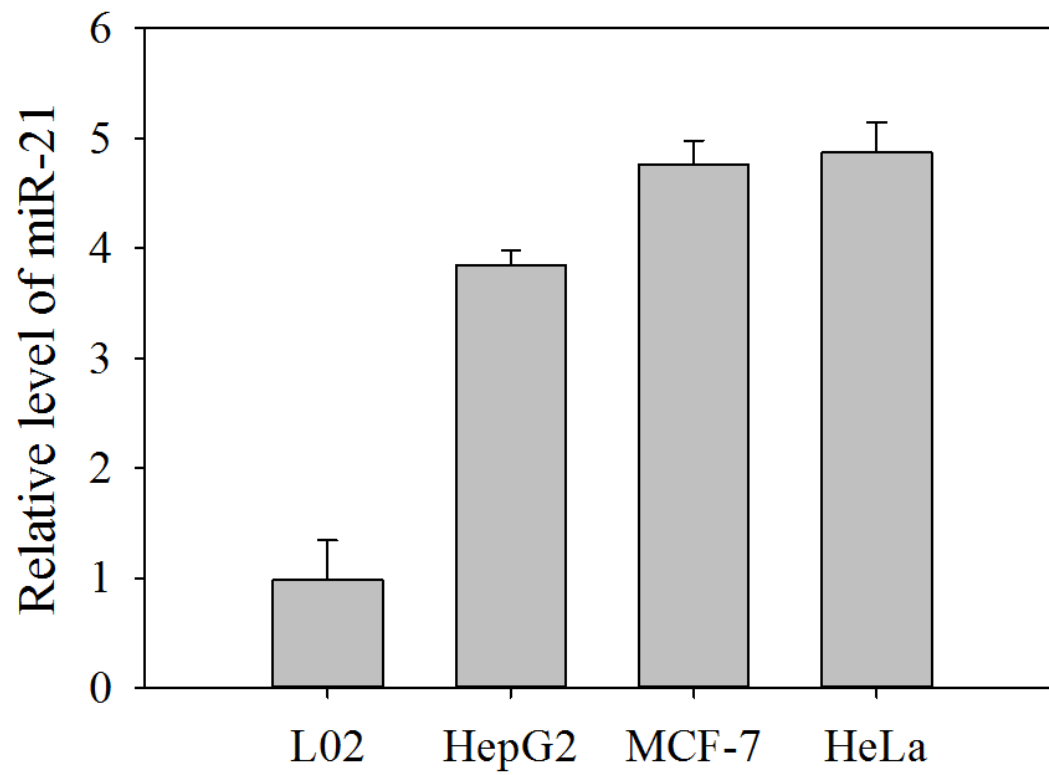

**Figure S11.** qRT-PCR analysis of relative expression levels of miR-21 in L02 cells, HepG2 cells, MCF-7 cells and HeLa cells.
